# Supplementary material for: Bio-distribution and bio-availability of silver and gold in rat tissues with silver/gold nanorod administration
Source: PubMed Central journal article supplement — RSC Adv. 2018 Mar 29;8(22):12260–8. doi: 10.1039/c8ra00044a (PMC9079266; doi:10.1039/c8ra00044a), 2018-03-29
Supplement: RA-008-C8RA00044A-s001.pdf [file RA-008-C8RA00044A-s001.pdf]

**Electronic Supplementary Material (ESI) for RSC Advances.  
This journal is © The Royal Society of Chemistry 2017**

## Supplementary Information

### **Bio-distribution and bio-availability of silver and gold in rat tissues with silver/gold nanorod administration**

Meiyu Wu,<sup>a,†</sup> Liang Chen,<sup>b,†</sup> Ruiru Li,<sup>a</sup> Mo Dan,<sup>c</sup> Haining Liu,<sup>a</sup> Xinsheng Wang,<sup>a</sup> Xiaochun Wu,<sup>a</sup> Ying Liu,<sup>d,\*</sup> Liming Xu,<sup>b,\*</sup> Liming Xie<sup>a,e,\*</sup>

<sup>a</sup> CAS Key Laboratory of Standardization and Measurement for Nanotechnology, NCNST-NIFDC Joint Laboratory for Measurement and Evaluation of Nanomaterials in Medical Applications, Center for Excellence in Nanoscience, National Center for Nanoscience and Technology, No.11.Beiyitiao Zhongguancun, Haidian District, Beijing, 100190, P. R. China

<sup>b</sup> Institute for Medical Devices Control, NCNST-NIFDC Joint Laboratory for Measurement and Evaluation of Nanomaterials in Medical Applications, National Institutes for Food and Drug Control, No.31 Huatuo Road, Biological medicine Industrial Base, Daxing District, Beijing, 102629, P. R. China.

<sup>c</sup> National Center for Safety Evaluation of Drugs, NCNST-NIFDC Joint Laboratory for Measurement and Evaluation of Nanomaterials in Medical Applications, National Institutes for Food and Drug Control, No. 8 Hongda Mid-Road, Beijing economic and Technological Development Zone, Daxing District, Beijing 100176, P. R. China

<sup>d</sup> CAS Key Laboratory for Biomedical Effects of Nanomaterials and Nanosafety, NCNST-NIFDC Joint Laboratory for Measurement and Evaluation of Nanomaterials in Medical Applications, Center for Excellence in Nanoscience, National Center for Nanoscience and Technology, No.11.Beiyitiao Zhongguancun, Haidian District, Beijing, 100190, P. R. China

<sup>e</sup> University of Chinese Academy of Sciences, Beijing 100049, P. R. China.

<sup>†</sup> Contributed equally to this work.

\*Corresponding authors

E-mail addresses: [liuy1@nanoctr.cn](mailto:liuy1@nanoctr.cn), [xuliming@nicpbp.org.cn](mailto:xuliming@nicpbp.org.cn), [xielm@nanoctr.cn](mailto:xielm@nanoctr.cn)

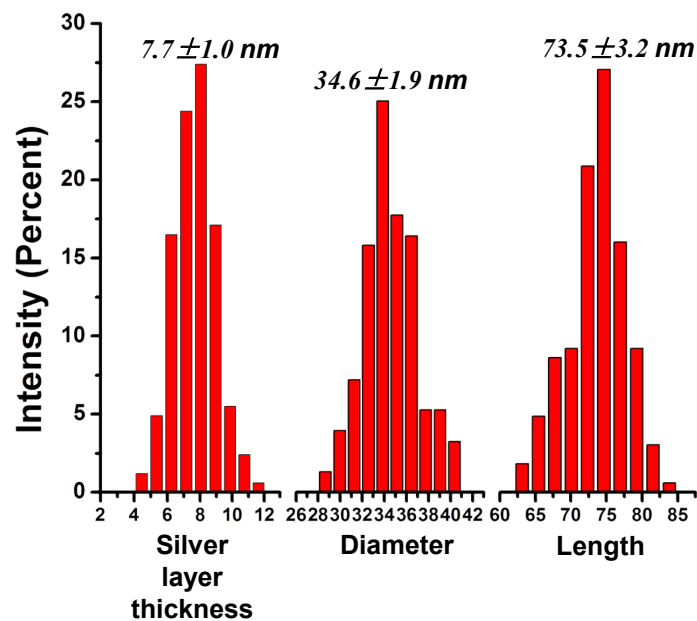

**Fig. S1** Statistical analysis of silver thickness, diameter and length of Au@Ag NRs based on TEM. (n=154)

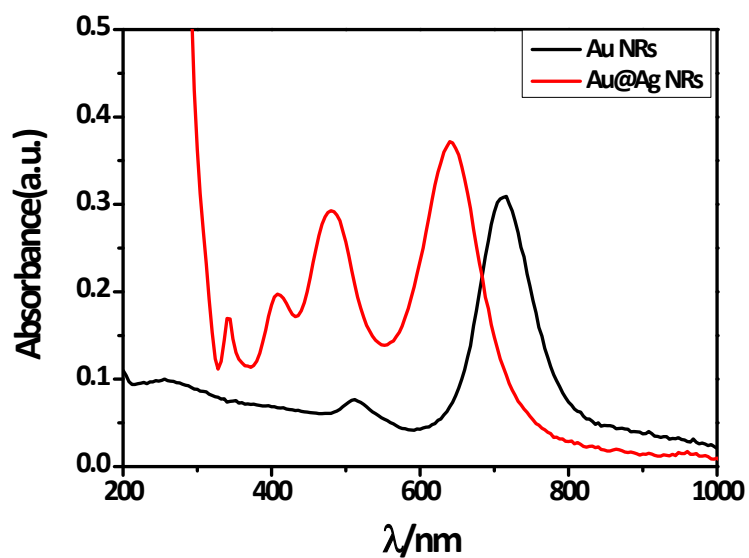

**Fig. S2** UV-Vis absorbance spectra of Au@Ag NRs in water. Au NRs were tested as control.

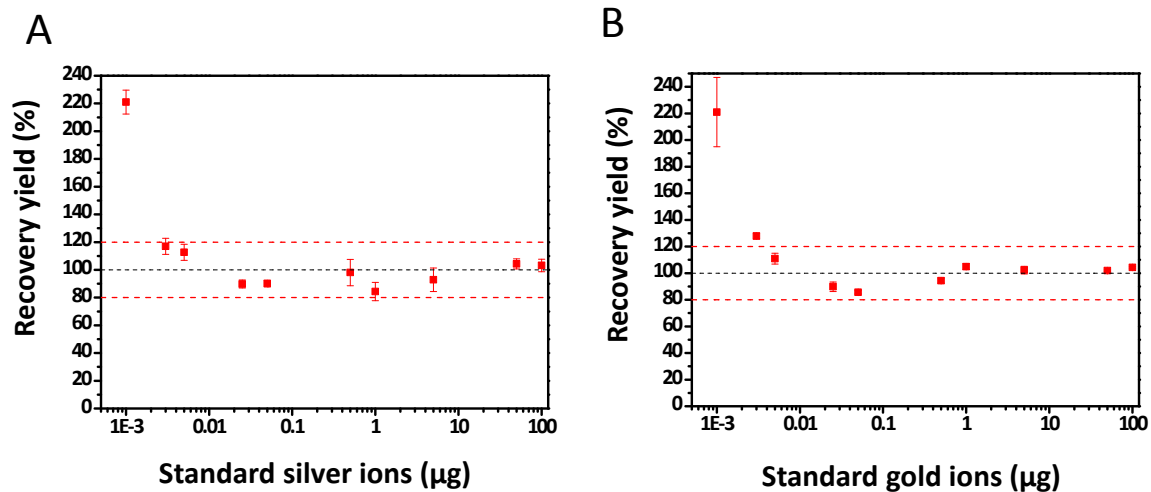

**Fig. S3** The recovery of silver (A) and gold (B) ions in the standard solution. A series of standard solutions containing from 0.001 to 100 μg Ag or Au were digested by microwave and then measured by ICP-MS (n=3 for each concentration). Black line: the recovery ratio of 100%. Red line: the recovery ratio of 100±20%.

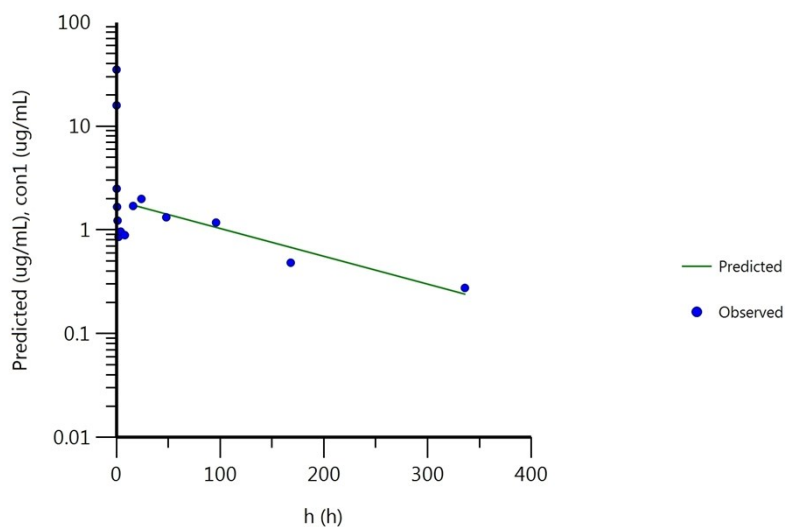

**Fig. S4** Observed Ag concentrations in the i.v. group v.s. predicted model (noncompartmental model)

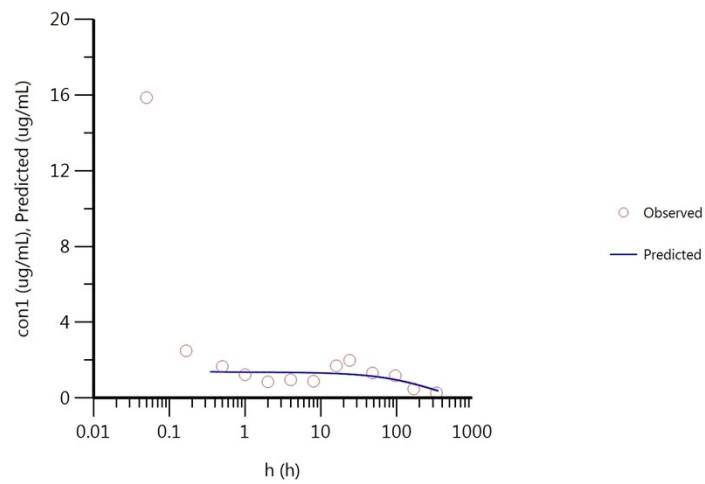

Fig. S5 Observed Ag concentrations in the i.v. group v.s. predicted model (two-compartment model)

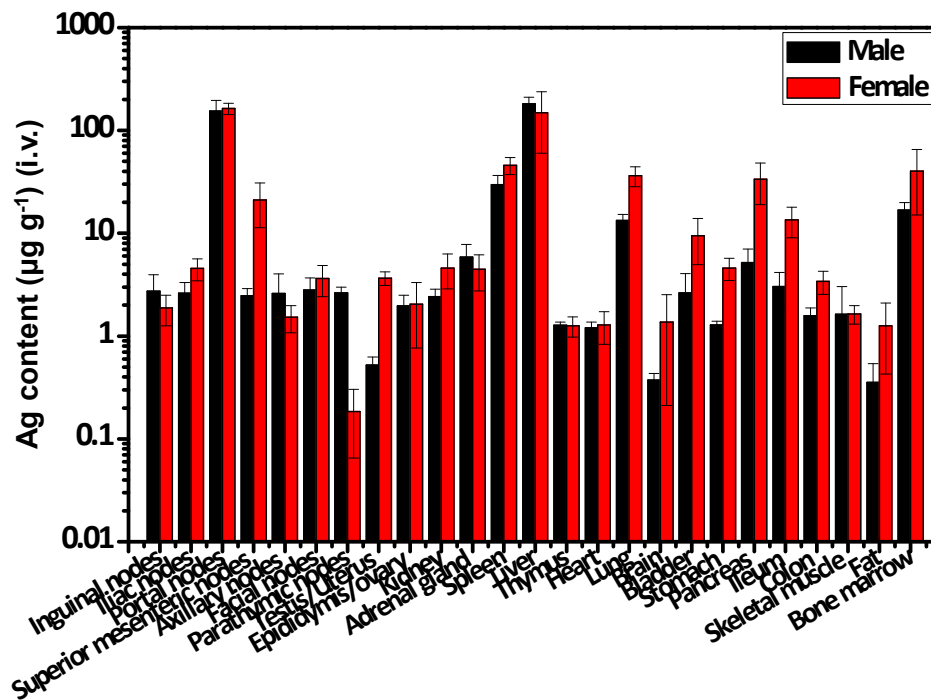

Fig. S6 The average content of Ag in male and female organs at 24 h after an i.v. injection. All data were deducted by the background value from blank organs.

**Table S1** The content of Ag and Au in different organs at 24 h after s.c. injection.

| s.c. injection (n=8 including 4 males and 4 females) |                                     |                                     |
|------------------------------------------------------|-------------------------------------|-------------------------------------|
| Organs                                               | Ag content ( $\mu\text{g g}^{-1}$ ) | Au content ( $\mu\text{g g}^{-1}$ ) |
| Inguinal nodes                                       | 1.5 $\pm$ 1.2                       | 0                                   |
| Iliac nodes                                          | 1.4 $\pm$ 1.4                       | 0                                   |
| Portal nodes                                         | 1.9 $\pm$ 1.2                       | 0                                   |
| Superior mesenteric nodes                            | 0.4 $\pm$ 0.2                       | 0                                   |
| Axillary nodes                                       | 27.1 $\pm$ 16.1                     | 1.5 $\pm$ 2.0                       |
| Facial nodes                                         | 0.3 $\pm$ 0.1                       | 0                                   |
| Parathyroid nodes                                    | 0.5 $\pm$ 0.5                       | 0                                   |
| Testis                                               | 0.13 $\pm$ 0.01                     | 0.01 $\pm$ 0.03                     |
| Uterus                                               | 0.7 $\pm$ 0.2                       | 0.10 $\pm$ 0.01                     |
| Epididymis                                           | 0.38 $\pm$ 0.04                     | 0.11 $\pm$ 0.07                     |
| Ovary                                                | 0.9 $\pm$ 0.3                       | 0.08 $\pm$ 0.05                     |
| Kidney                                               | 3.2 $\pm$ 4.7                       | 0.15 $\pm$ 0.16                     |
| Adrenal gland                                        | 189.4 $\pm$ 183.6                   | 0                                   |
| Spleen                                               | 0.8 $\pm$ 0.2                       | 1.0 $\pm$ 1.3                       |
| Liver                                                | 3.4 $\pm$ 1.9                       | 2.5 $\pm$ 3.1                       |
| Thymus                                               | 0.8 $\pm$ 0.8                       | 0.06 $\pm$ 0.05                     |
| Heart                                                | 22.5 $\pm$ 23.2                     | 0.09 $\pm$ 0.12                     |
| Lung                                                 | 0.4 $\pm$ 0.1                       | 0.04 $\pm$ 0.04                     |
| Brain                                                | 0.06 $\pm$ 0.04                     | 0                                   |
| Bladder                                              | 0.3 $\pm$ 0.1                       | 0.07 $\pm$ 0.15                     |
| Stomach                                              | 0.3 $\pm$ 0.1                       | 0.06 $\pm$ 0.08                     |
| Pancreas                                             | 0.4 $\pm$ 0.1                       | 0.3 $\pm$ 0.5                       |
| Ileum                                                | 0.6 $\pm$ 0.3                       | 0.11 $\pm$ 0.16                     |
| Colon                                                | 0.5 $\pm$ 0.3                       | 0.3 $\pm$ 0.4                       |
| Skeletal muscle                                      | 0.12 $\pm$ 0.07                     | 0.10 $\pm$ 0.14                     |
| Fat                                                  | 0.35 $\pm$ 0.43                     | 0.01 $\pm$ 0.01                     |
| Bone marrow                                          | 5.8 $\pm$ 3.4                       | 0.137                               |

**Table S2** The gender-related distribution of Ag and Au in different organs at 24 h after i.v. injection.

| <b>i.v. injection (n=8 including 4 males and 4 females)</b> |                                                     |               |                                                     |               |
|-------------------------------------------------------------|-----------------------------------------------------|---------------|-----------------------------------------------------|---------------|
| <b>Organs</b>                                               | <b>Ag content (<math>\mu\text{g g}^{-1}</math>)</b> |               | <b>Au content (<math>\mu\text{g g}^{-1}</math>)</b> |               |
|                                                             | <b>Male</b>                                         | <b>Female</b> | <b>Male</b>                                         | <b>Female</b> |
| Inguinal nodes                                              | 2.7±1.2                                             | 1.9±0.6       | 0.07                                                | 0.12±0.06     |
| Iliac nodes                                                 | 2.6±0.7                                             | 4.6±1.1       | 2.4±0.9                                             | 0             |
| Portal nodes                                                | 154.6±42.1                                          | 163.7±20.8    | 147.3±25.0                                          | 171.1±29.1    |
| Superior mesenteric nodes                                   | 2.5±0.4                                             | 21.2±9.8      | 1.3±0.7                                             | 0.16±0.10     |
| Axillary nodes                                              | 2.6±1.4                                             | 1.5±0.5       | 0.43±0.03                                           | 0.05±0.08     |
| Facial nodes                                                | 2.8±0.9                                             | 3.6±1.2       | 1.8±0.6                                             | 1.5±0.9       |
| Parathyroid nodes                                           | 2.6±0.4                                             | 0.19±0.12**   | 0.30±0.01                                           | 0             |
| Testis/Uterus                                               | 0.5±0.1                                             | 3.7±0.6       | 0.10±0.06                                           | 0.16±0.03     |
| Epididymis/Ovary                                            | 2.0±0.5                                             | 2.0±1.3       | 0.7±0.2                                             | 0.8±0.1       |
| Kidney                                                      | 2.4±0.4                                             | 4.6±1.7       | 0.9±0.5                                             | 0.3±0.1       |
| Adrenal gland                                               | 5.9±1.9                                             | 4.5±1.7       | 4.7±0.8                                             | 2.3±1.2       |
| Spleen                                                      | 29.7±6.8                                            | 45.9±8.7      | 32.7±7.6                                            | 44.0±9.0      |
| Liver                                                       | 182.1±28.4                                          | 148.8±88.8    | 1863.5±181.8                                        | 159.3±86.6**  |
| Thymus                                                      | 1.3±0.1                                             | 1.3±0.3       | 0.4±0.1                                             | 0.31±0.15     |
| Heart                                                       | 1.2±0.2                                             | 1.3±0.5       | 0.58±0.04                                           | 0.34±0.03     |
| Lung                                                        | 13.3±1.9                                            | 36.4±8.0**    | 9.8±2.3                                             | 9.5±2.9       |
| Brain                                                       | 0.4±0.1                                             | 1.4±1.2       | 0.05±0.03                                           | 0             |
| Bladder                                                     | 2.6±1.4                                             | 9.5±4.5       | 0.19±0.06                                           | 0.15±0.17     |
| Stomach                                                     | 1.3±0.1                                             | 4.6±1.1       | 0.18±0.14                                           | 0             |
| Pancreas                                                    | 5.2±1.8                                             | 33.7±14.7     | 0.26±0.07                                           | 0.6±0.3       |
| Ileum                                                       | 3.0±1.1                                             | 13.5±4.4      | 0.19±0.01                                           | 0.4±0.2       |
| Colon                                                       | 1.6±0.3                                             | 3.4±0.9       | 0.15±0.06                                           | 0.9±0.3       |
| Skeletal muscle                                             | 1.6±1.4                                             | 1.64±0.33     | 0.15±0.07                                           | 0.21±0.19     |
| Fat                                                         | 0.36±0.18                                           | 1.7±0.8       | 0.14±0.08                                           | 0.6±0.5       |
| Bone marrow                                                 | 16.9±3.1                                            | 40.3±25.2     | 15.5±5.6                                            | 14.06         |

\*\*Significant difference by One-Way ANOVA between males and females. (\*\* p<0.01)
